# Supplementary material for: Lithiophilic SiO2 nanoparticle pillared MXene nanosheets for stable and dendrite-free lithium metal anodes
Source: Royal Society of Chemistry journal article supplement (doi:10.1039/d3ta03877g), 2023-01-01
Supplement: d3ta03877g1.pdf [file d3ta03877g1.pdf]

## Supporting Information for

### Lithophilic SiO<sub>2</sub> Nanoparticle Pillared MXene Nanosheets for Stable and Dendrite-Free Lithium Metal Anodes

*Shuaiqi Wang, Yaru Li, Xiaoze Zhou, Yi Yang, and Gang Chen\**

School of Physical Science and Technology, ShanghaiTech University, Shanghai  
201210, China

\*E-mail: gchen@shanghaitech.edu.cn

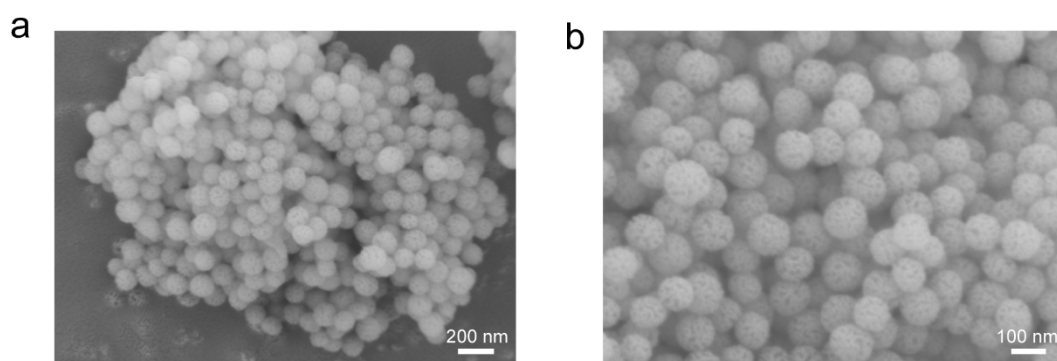

**Figure S1.** (a) Low magnification and (b) High magnification SEM images of SiO<sub>2</sub> nanoparticles. The diameter of SiO<sub>2</sub> nanoparticles is about 200 nm.

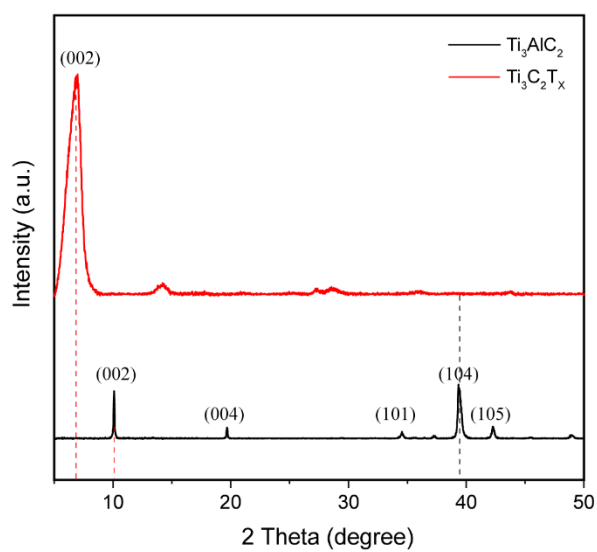

**Figure S2.** XRD patterns of MAX phase ( $\text{Ti}_3\text{AlC}_2$ ) and MXene ( $\text{Ti}_3\text{C}_2\text{T}_x$ ).

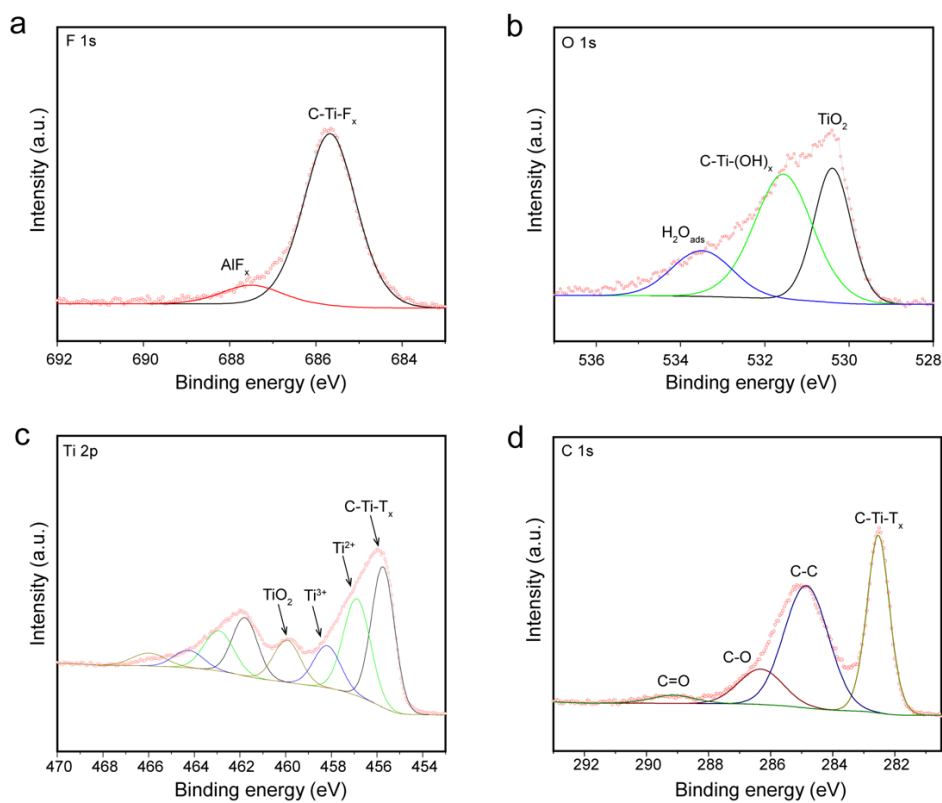

**Figure S3.** XPS characterization of MXene nanosheets. (a) F 1s, (b) O 1s, (c) Ti 2p, (d) C 1s.

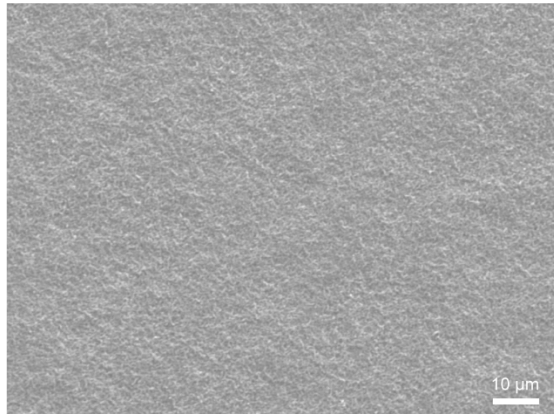

**Figure S4.** SEM image of the surface of the MXene/SiO<sub>2</sub> composite film.

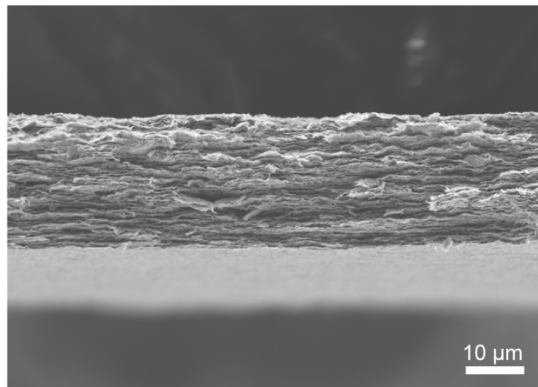

**Figure S5.** Cross-sectional SEM image of the MXene/SiO<sub>2</sub> composite film.

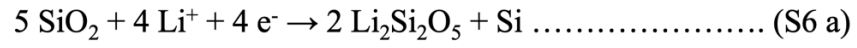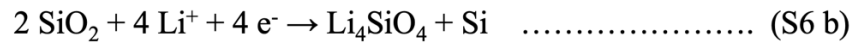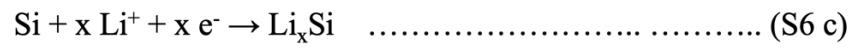

**Figure S6.** The electrochemical reactions of SiO<sub>2</sub> with Li.<sup>1,2</sup>

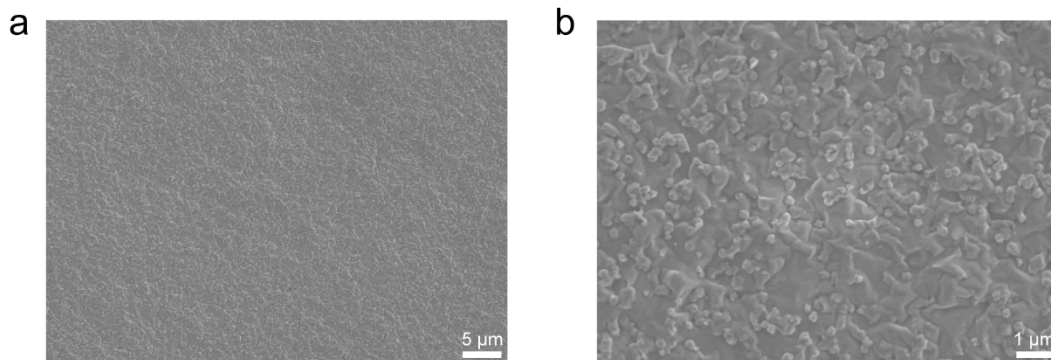

**Figure S7.** (a) Low magnification and (b) High magnification SEM images of the surfaces of the MXene/SiO<sub>2</sub> electrode after 10 cycles.

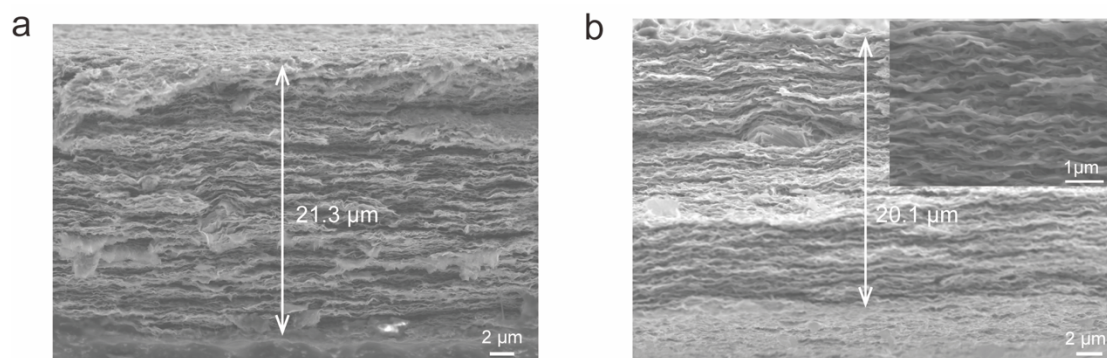

**Figure S8.** The cross-sectional SEM images of the MXene/SiO<sub>2</sub> composite film (a) at the initial state and (b) after 50 cycles of Li plating/stripping with the areal capacity of 3 mAh cm<sup>-2</sup>. The inset shows the zoomed-in cross-sectional SEM image.

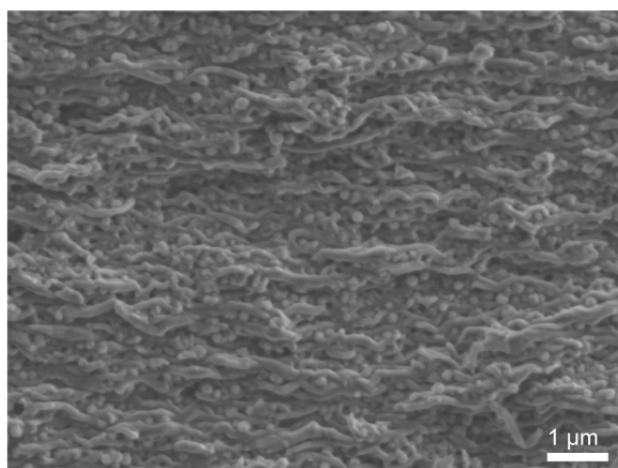

**Figure S9.** Cross-sectional SEM image of the MXene/SiO<sub>2</sub> electrode after Li plating at the capacity of 3 mAh/cm<sup>2</sup>.

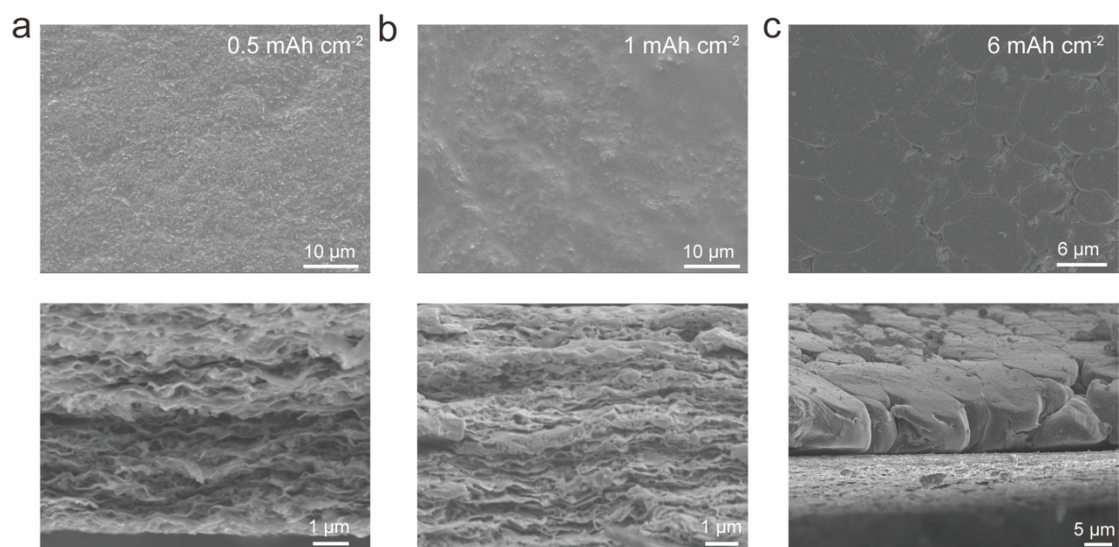

**Figure S10.** Top-view and cross-sectional SEM images of the MXene/SiO<sub>2</sub> films taken for different Li deposition capacities of (a) 0.5 mAh cm<sup>-2</sup>, (b) 1 mAh cm<sup>-2</sup>, (c) 6 mAh cm<sup>-2</sup>. Li is preferentially deposited inside the MXene/SiO<sub>2</sub> films when the areal capacity is small. At sufficiently large capacity, Li starts to deposit on the surface of the MXene/SiO<sub>2</sub> film.

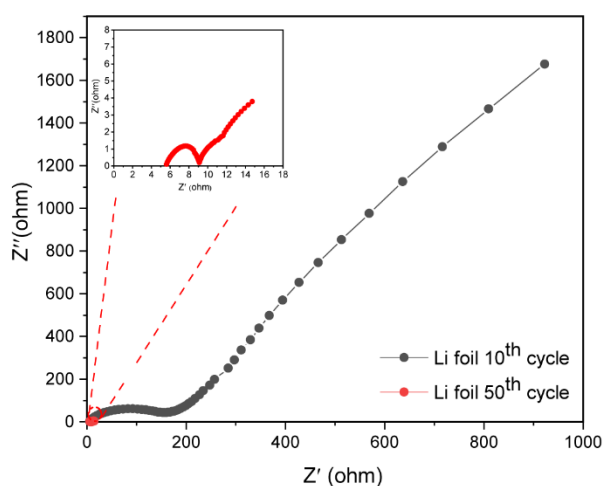

**Fig S11.** EIS spectra of the Li-Cu half cell taken at 10<sup>th</sup> and 50<sup>th</sup> cycles. The inset shows the zoomed-in view of the EIS spectrum recorded at 50<sup>th</sup> cycle.

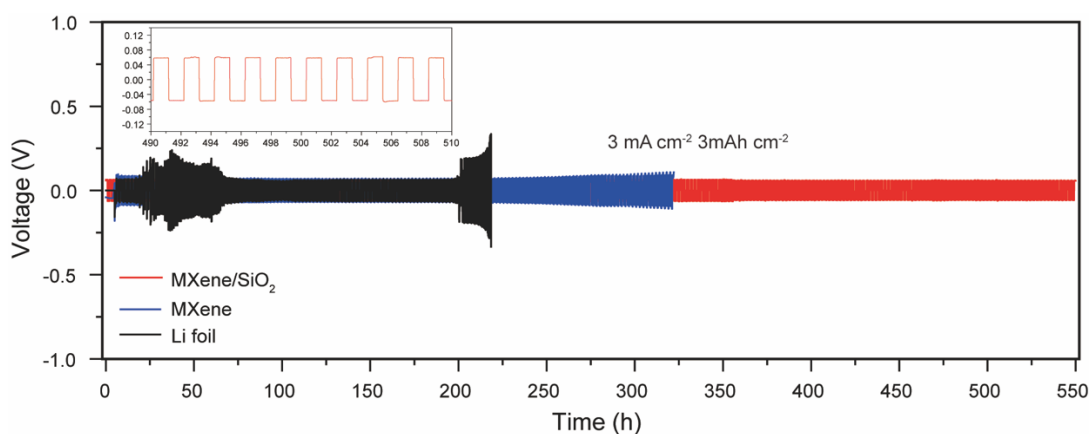

**Fig S12.** The cycling performance of the symmetric cells with the areal capacity of  $3 \text{ mAh cm}^{-2}$  at the current density of  $3 \text{ mA cm}^{-2}$ . The inset shows the zoomed-in profile from 490 to 510 h.

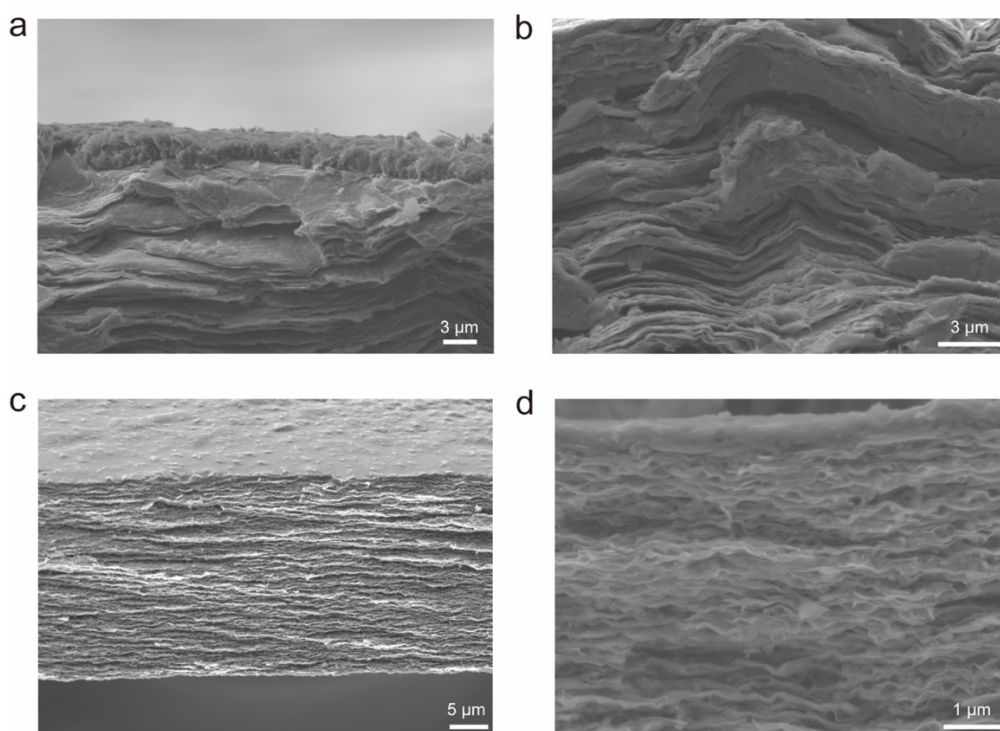

**Fig S13.** The cross-sectional SEM images of the MXene and MXene/SiO<sub>2</sub> films after cycling in the symmetric cells for 200 h with the areal capacity of  $2 \text{ mAh cm}^{-2}$  at  $2 \text{ mA cm}^{-2}$ . (a) Low magnification and (b) High magnification cross-sectional SEM images of the MXene film. (c) Low magnification and (d) High magnification cross-sectional SEM images of the MXene/SiO<sub>2</sub> film

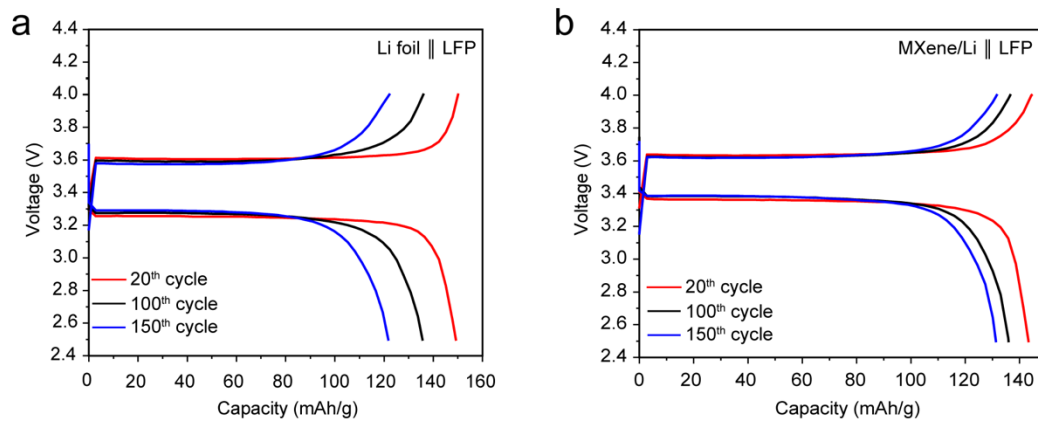

**Figure S14.** The charge–discharge profiles of the full cells with LFP as the cathode recorded at 1C. a) Li foil as the anode. b) The MXene/Li film as the anode.



**Table S1.** The electrochemical performance of the MXene/SiO<sub>2</sub> composite film is compared with most recent literatures about the MXene films.

| Anode                                 | Cathode    | Current density | Voltage window   | Cycling number | Capacity retention | Ref.             |
|---------------------------------------|------------|-----------------|------------------|----------------|--------------------|------------------|
| MXene/g-C <sub>3</sub> N <sub>4</sub> | LFP        | 0.5C            | 4.0-2.2 V        | 320            | 85.5%              | 3                |
| MXene film                            | LFP        | 1C              | 3.8-2.5 V        | 80             | 87.7%              | 4                |
| MXene@CNF                             | LFP        | 0.2C            | 3.8-2.0 V        | 200            | 94%                | 5                |
| Mxene aerogel                         | LFP        | 1C              | 4.1-2.2 V        | 500            | 70.4%              | 6                |
| MXene@Au                              | LFP        | 1C              | 3.8-2.5 V        | 200            | 98.47%             | 7                |
| MXene (Nb <sub>2</sub> C)             | NCM        | 0.25C           | 4.3V-3 V         | 100            | 78%                | 8                |
| B-doped MXene                         | LFP        | 0.5 C           | 3-0.05 V         | 35             | 90%                | 9                |
| MXene/Si/C                            | LNMO       | 1C              | 5.0-3.5 V        | 300            | 95.52%             | 10               |
| <b>MXene/SiO<sub>2</sub> film</b>     | <b>LFP</b> | <b>3C</b>       | <b>4.0-2.5 V</b> | <b>350</b>     | <b>≈100%</b>       | <b>This work</b> |

Note: NCM: LiNi<sub>1/3</sub>Co<sub>1/3</sub>Mn<sub>1/3</sub>O<sub>2</sub> and LNMO: LiNi<sub>0.5</sub>Mn<sub>1.5</sub>O<sub>4</sub>

## References:

- [1] R. Pathak, K. Gurung, B. Bahrami, A. Wu, N. Ghimire, B. Zhou, W. Zhang, Y. Zhou, Q. Qiao, *Adv. Energy Mater.* **2019**, *9*, 1901486.
- [2] G. Lee, S. Kim, J. Choi, *Adv. Funct. Mater.* **2017**, *27*, 1703538.
- [3] F. Zhao, P. Zhai, Y. Wei, Z. Yang, Q. Chen, J. Zuo, X. Gu and Y. Gong, *Adv. Sci.*, 2022, **9**, 2103930-2103941.
- [4] C. Wei, H. Fei, Y. Tian, Y. An, H. Guo, J. Feng, Y. Qian, *Energy Storage Mater.*, 2020, **26**, 223-233.
- [5] C. Wang, Z. Zheng, Y. Feng, H. Ye, F. Cao, Z. Guo, *Nano Energy*, 2020, *74*, 104817-104825.
- [6] X. Meng, Y. Sun, M. Yu, Z. Wang, J. Qiu, *Small Science*, 2021, **1**, 2100021-2100030.
- [7] Y. Qian, C. Wei, Y. Tian, B. Xi, S. Xiong, J. Feng, Y. Qian, *Chem. Eng. J.*, 2021, **421**, 129685-129691.
- [8] W. Zhang, H. Jin, Y. Du, G. Chen, J. Zhang, *Electrochimica Acta*, 2021, **390**, 138812-138817.
- [9] N. Wu, Q. Zhang, Y. Guo, L. Zhou, L. Zhang, M. Wu, W. Wang, Y. Yin, P. Sheng, S. Xin, *Rare Metals*, 2022, **41**, 2217-2222.
- [10] Y. An, Y. Tian, Y. Zhang, C. Wei, L. Tan, C. Zhang, N. Cui, S. Xiong, J. Feng, Y. Qian, *ACS Nano*, 2020, **14**, 17574-17588.
